# Supplementary material
Source: PubMed Central journal article supplement (PMC3113617)
Supplement: NIHMS292672-supplement-01.pdf [file NIHMS292672-supplement-01.pdf]

## Supplemental Information

### Th17 Cells Express Interleukin-10 Receptor and Are Controlled by Foxp3<sup>-</sup> and Foxp3<sup>+</sup> Regulatory

### CD4<sup>+</sup> T Cells in an Interleukin-10-Dependent Manner

Samuel Huber, Nicola Gagliani, Enric Esplugues, William O'Connor, Jr., Francis J. Huber, Ashutosh Chaudhry, Masahito Kamanaka, Yasushi Kobayashi, Carmen J. Booth, Alexander Y. Rudensky, Manuela Battaglia, Maria Grazia Roncarolo, and Richard A. Flavell

## Inventory of Supplemental Information

Figure S1 (related to Figure 1). IL-10 producing cells in the duodenum express LAG-3.

Figure S2 (related to Figure 3). *Cd4*-DNIL-10R transgenic (Tg) mice show no spontaneous CD4 T cell phenotype.

Figure S3 (related to Figure 4). IL-10 signaling in T cells is not essential for the emergence of IL-17+IL-10+ double producing T cells.

Figure S4 (related to Figure 5 and 6). Experimental design to isolate *in vivo* differentiated Th17 cells.

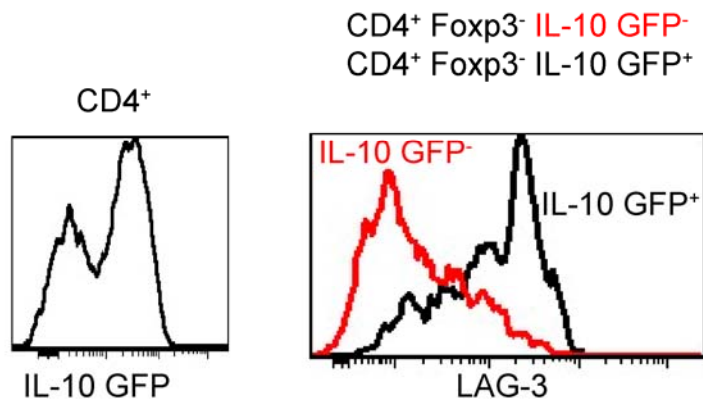

**Figure S1 (related to Figure 1): IL-10 producing cells in the small intestine express LAG-3.** Foxp3 RFP IL-10 eGFP double reporter mice were treated with anti-CD3. Mononuclear cells were isolated from the small intestine and stained for LAG-3 and CD4. Cells were gated as indicated.

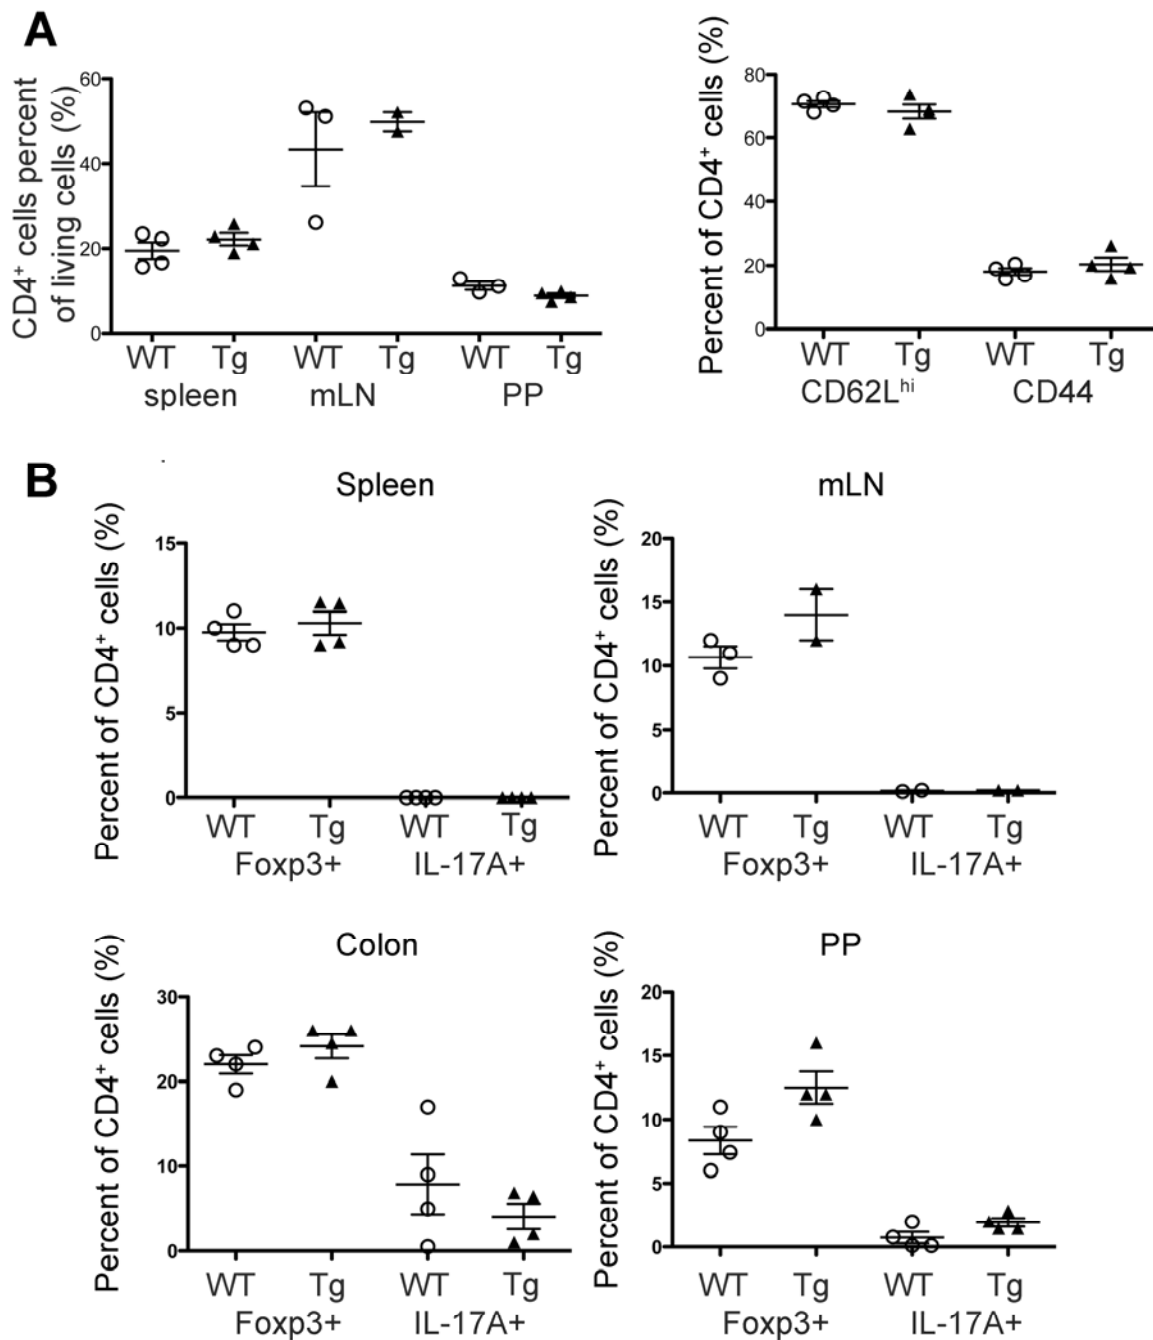

**Figure S2 (related to Figure 2): *Cd4*-DNIL-10R transgenic (Tg) mice show no spontaneous CD4 T cell phenotype. A:** CD4 T cell frequency in spleen, mesenteric lymph nodes (mLN) and Peyers Patches (PP). Cells are gated on living events. **B:** Frequency of Foxp3 RFP and IL-17A eGFP positive cells in spleen, MLN, colon, and PP. Cells are gated on CD4<sup>+</sup> events. 8-week-old littermates were analyzed. Results are representative of at least three independent experiments. Mean  $\pm$  SEM are shown.

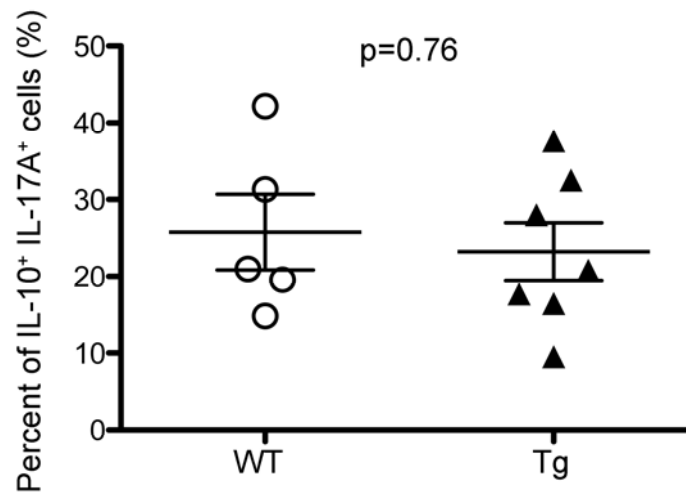

**Figure S3 (related to Figure 4): IL-10 signaling in T cells is not essential for the emergence of IL-17A<sup>+</sup>IL-10<sup>+</sup> double producing T cells.** *Cd4*-DNIL-10R or WT Foxp3 RFP IL-10 eGFP double reporter mice were injected with anti-CD3. CD4<sup>+</sup> T cells were isolated from the small intestine. Cells were re-stimulated *in vitro* with PMA and Ionomycin, and intracellular cytokine staining for IL-17A and anti-GFP was performed. Cells are gated on CD4<sup>+</sup>IL-17A<sup>+</sup> events. Results are representative of four independent experiments. Mean  $\pm$  SEM are shown.

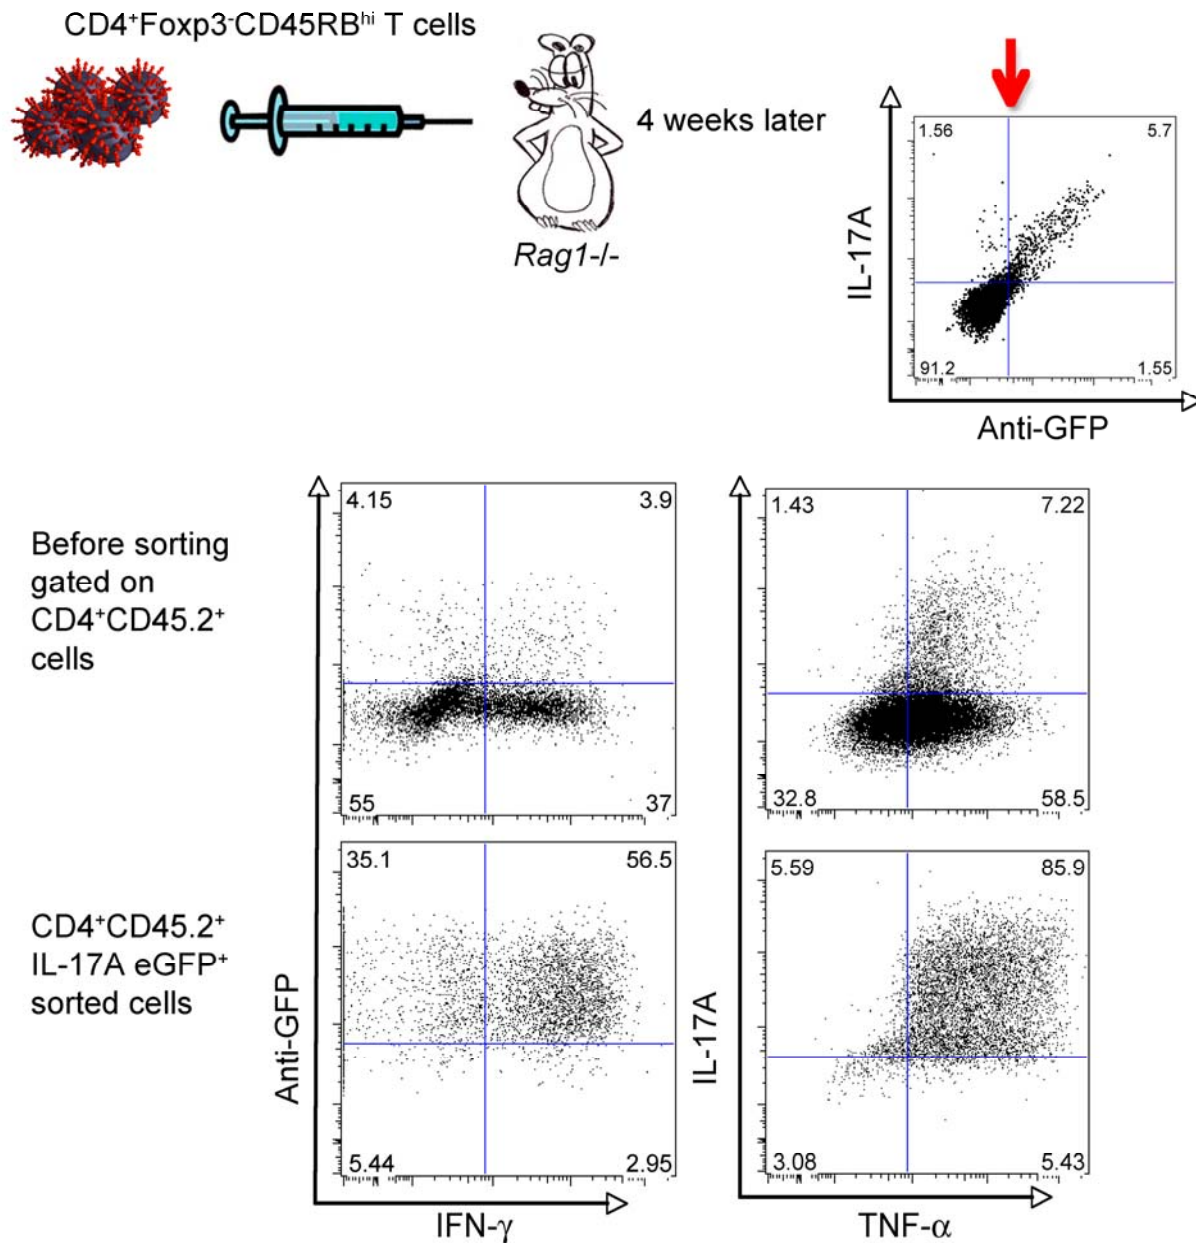

**Figure S4 (related to Figure 5 + 6): Experimental design to isolate *in vivo* differentiated Th17 cells.** CD4<sup>+</sup>Foxp3<sup>+</sup>CD45RB<sup>hi</sup> T cells were isolated from the spleen and lymph nodes of Foxp3 RFP IL-17A eGFP double reporter mice (CD45.2), and transferred i.p. into *Rag1*<sup>-/-</sup> (CD45.1) mice (250-300 x10<sup>3</sup> cells/mouse). Based on the endoscopic colitis score (between 9-13) mice were sacrificed about 4 weeks after the transfer, and cells isolated from the colon and mesenteric lymph nodes. (Upper left) Correlation of IL-17A protein levels with IL-17A eGFP expression. (Bottom)

CD4<sup>+</sup>CD45.2<sup>+</sup>IL-17A<sup>+</sup> eGFP<sup>+</sup> Foxp<sup>+</sup> RFP<sup>-</sup> cells were sorted using FACS. Part of the samples before and after the sorting was re-stimulated using PMA and Ionomycin. TNF- $\alpha$ , IFN- $\gamma$ , IL-17A and IL-17A eGFP expression was analyzed using intracellular cytokine staining. Data are representative of 2 independent experiments.
